# Supplementary material for: Development of prognostic index based on autophagy-related genes analysis in breast cancer
Source: publisher site journal article supplement (doi:10.18632/aging.102687), 2020-01-22
Supplement: Supplementary file [file aging-v12i2-102687-supplementary-material-SD1.pdf]

**SUPPLEMENTARY FIGURES**

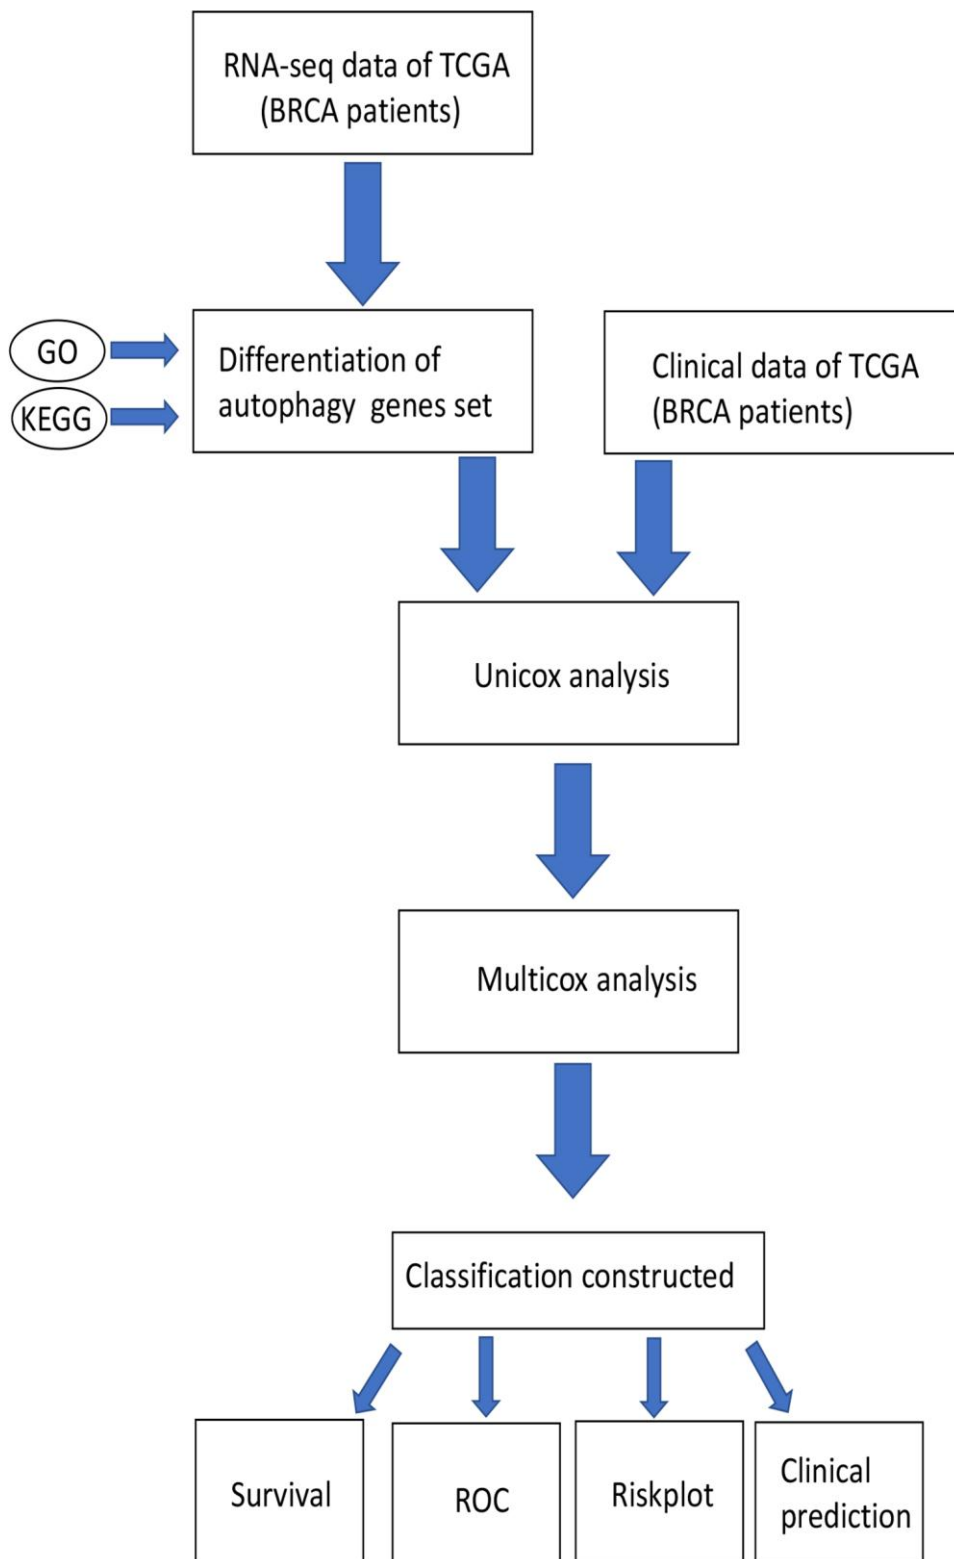

**Supplementary Figure 1. Flowchart for identifying 12 ARGs signature associated with breast cancer survival.**

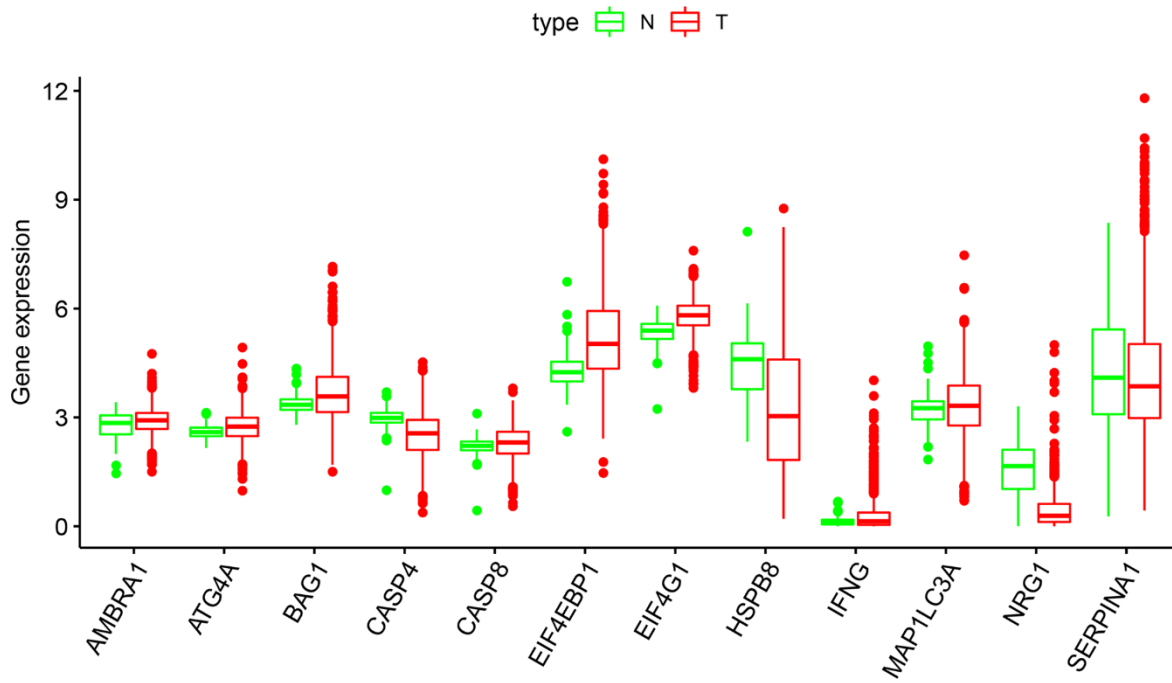

Supplementary Figure 2. The expression patterns of these 12-ARGs.

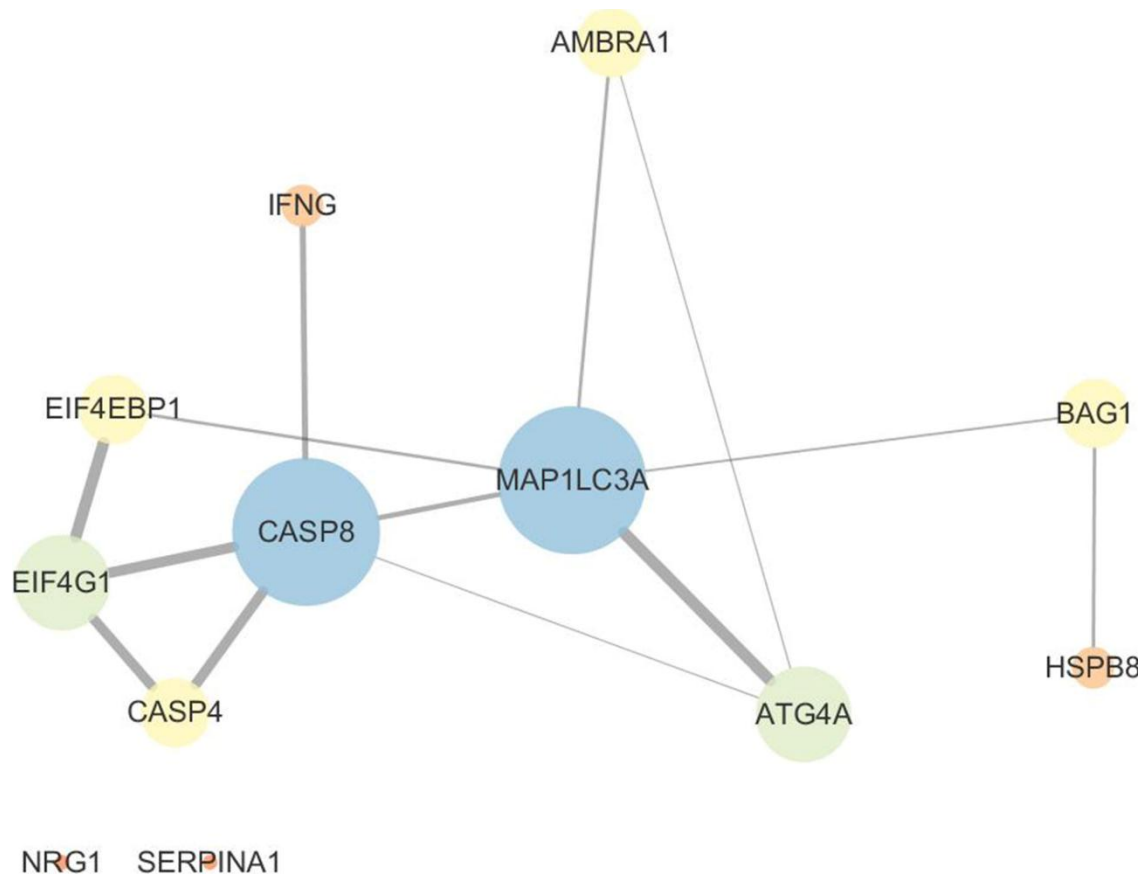

Supplementary Figure 3. Protein-protein interaction (PPI) network of 12-ARGs.
